# Supplementary material
Source: publisher figshare collection journal article supplement (https://gsapubs.figshare.com/ndownloader/files/22739852)
Supplement: Supplementary file 1 [file 22739852]

GSA Data Repository Item # 8509

Title of article Neogene Paleostress Changes in the Basin and Range:

A Case Study at Hoover Dam, Nevada-Arizona

Author(s) J. Angelier et al.

see GSA Bulletin v. 96, p. 347 - 361

Contents 6 pages

Tables 1, 2, 3, and fig. 1 with caption

---

---

---

---

---

---

---

---

---

---

ARCHIVED DATA PERTAINING TO THE FOLLOWING REPORT:

Angelier, J., Colletta, B., and Anderson, R. E., 1985, Neogene paleostress changes in the Basin and Range: A case study at Hoover Dam, Nevada-Arizona: Geological Society of America Bulletin, v. 96, no. 2, p. \_\_\_\_\_.

The data consist of one figure (caption on separate page) and three tables.

FIGURE 1.--Automatic separation of two classes of paleostress with different directions of extension, for sites A + B (AB) and C + D (CD), ABs and CDs, predominantly strike-slip faults. ABn and CDn, predominantly dip-slip normal faults. Preliminary separation between strike-slip and dip-slip fault movements has been made by comparing lateral and transverse components of motion (as for column a of Figure 10 of subject report). Note that fault populations are split in two main classes that correspond to NE-SW and WNW-ESE directions of extensions. Details in Table 3 of data archive. Other explanations as for Figure 10 of subject report.

1

2

3

2076 p 92

AB<sub>s</sub>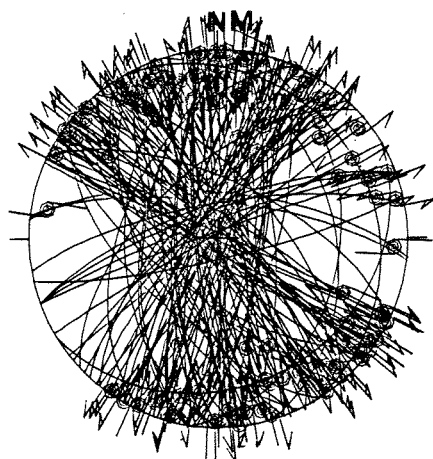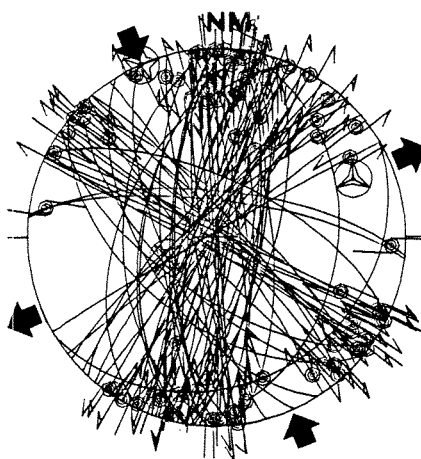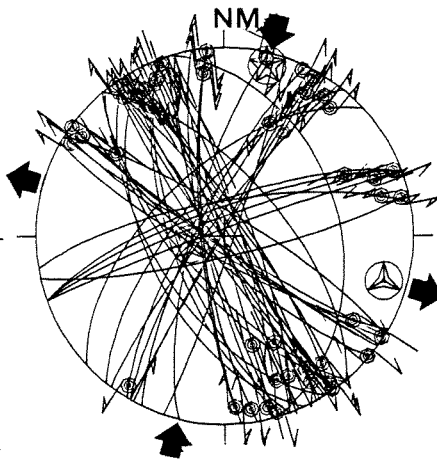CD<sub>s</sub>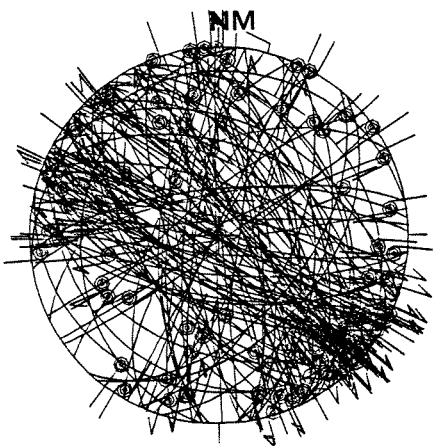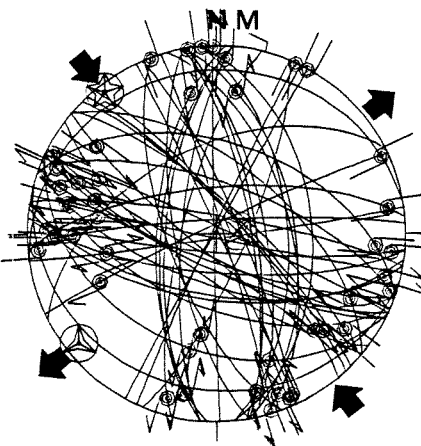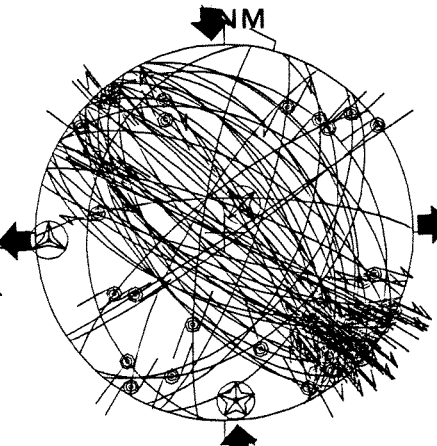

Figure 1.

AB<sub>n</sub>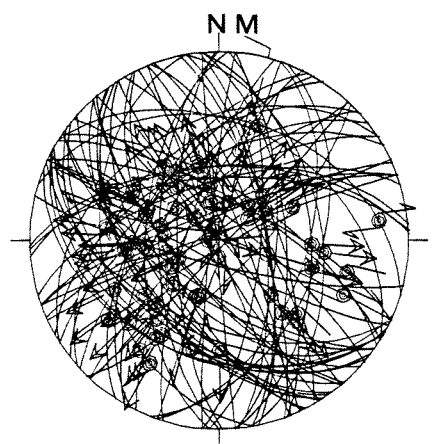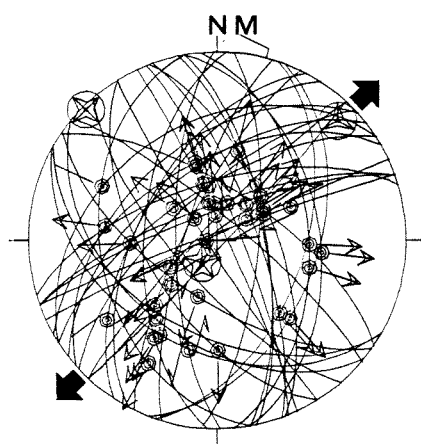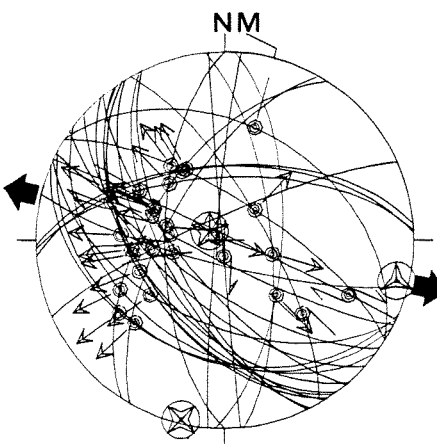CD<sub>n</sub>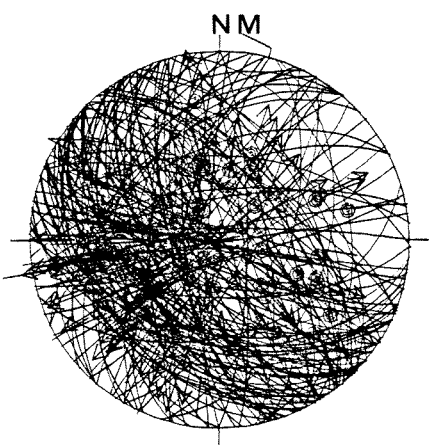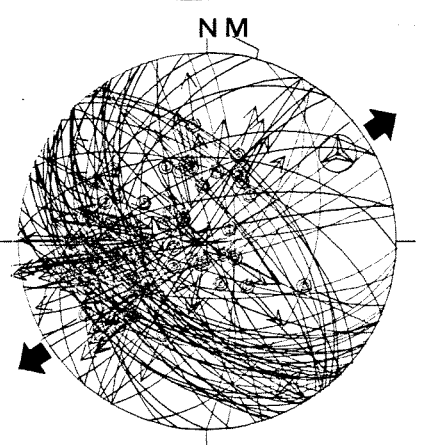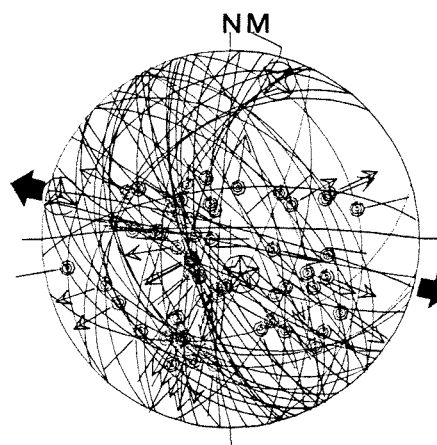

TABLE 1. RESULTS OF AUTOMATIC SEPARATIONS OF PREDOMINANTLY STRIKE-SLIP TYPE (i.e., steeply plunging  $\sigma_2$  axis), AND PREDOMINANTLY NORMAL TYPE (i.e., steeply plunging  $\sigma_1$  axis) OF PALEOSTRESS, FOR SUBSETS A, B, C, AND D

| Site | Size of class | Type of extension ( $\sigma_3$ ) | $\sigma_1$ -axis   |                     | $\sigma_2$ -axis   |                     | $\sigma_3$ -axis   |                     |
|------|---------------|----------------------------------|--------------------|---------------------|--------------------|---------------------|--------------------|---------------------|
|      |               |                                  | trend ( $^\circ$ ) | plunge ( $^\circ$ ) | trend ( $^\circ$ ) | plunge ( $^\circ$ ) | trend ( $^\circ$ ) | plunge ( $^\circ$ ) |
| A    | 42 ( 48)      | strike-slip                      | 350                | 01                  | 255                | 79                  | 080                | 11                  |
|      | 20 ( 26)      | normal                           | 065                | 88                  | 325                | 00                  | 235                | 02                  |
| B    | 81 (125)      | strike-slip                      | 167                | 01                  | 260                | 78                  | 077                | 12                  |
|      | 52 (101)      | normal                           | 258                | 74                  | 153                | 04                  | 061                | 15                  |
| C    | 66 ( 85)      | strike-slip                      | 154                | 04                  | 032                | 83                  | 245                | 06                  |
|      | 60 ( 85)      | normal                           | 238                | 78                  | 015                | 09                  | 106                | 08                  |
| D    | 36 ( 46)      | strike-slip                      | 158                | 12                  | 022                | 74                  | 250                | 11                  |
|      | 80 (107)      | normal                           | 303                | 68                  | 146                | 21                  | 053                | 08                  |

| Site | $\frac{\sigma_2 - \sigma_3}{\sigma_1 - \sigma_3} = \Phi$ | Average angle, $\Delta$ ( $^\circ$ ) | Unclassified data | Ambiguous data |
|------|----------------------------------------------------------|--------------------------------------|-------------------|----------------|
| A    | 0.1<br>0.1                                               | 12<br>13                             | 8 (12)            | 1              |
| B    | 0.1<br>0.0                                               | 11<br>12                             | 11 (23)           | 1              |
| C    | 0.1<br>0.0                                               | 14<br>16                             | 14 (18)           | 4              |
| D    | 0.1<br>0.1                                               | 10<br>13                             | 14 (14)           | 3              |

Note: Unclassified data refer to faults with angles between slickenside lineations and theoretical shear stress greater than  $45^\circ$  for both solutions. Ambiguous data refer to faults that have similar angles between slickenside lineations and shear stress for both solutions (within a range of  $10^\circ$ ).  $\Phi$  is the stress ratio. Weighted values are in parentheses. Average angle is that between actual striae and theoretical shear stress on fault plane.

TABLE 2. RESULTS OF AUTOMATIC SEPARATIONS OF TWO TYPES OF PALEOSTRESS WITH DIFFERENT DIRECTIONS OF EXTENTION, FOR ENTIRE DATA SETS OF SITES A, B, C, AND D

| Site | Size of class | Type of extension ( $\sigma_3$ ) | $\sigma_1$ -axis   |                     | $\sigma_2$ -axis   |                     | $\sigma_3$ -axis   |                     |
|------|---------------|----------------------------------|--------------------|---------------------|--------------------|---------------------|--------------------|---------------------|
|      |               |                                  | trend ( $^\circ$ ) | plunge ( $^\circ$ ) | trend ( $^\circ$ ) | plunge ( $^\circ$ ) | trend ( $^\circ$ ) | plunge ( $^\circ$ ) |
| A    | 31 ( 33)      | NE-SW                            | 177                | 62                  | 310                | 20                  | 047                | 19                  |
|      | 27 ( 36)      | WNW-ESE                          | 015                | 38                  | 218                | 50                  | 114                | 12                  |
| B    | 66 (116)      | NE-SW                            | 317                | 52                  | 138                | 38                  | 047                | 00                  |
|      | 56 (101)      | WNW-ESE                          | 360                | 68                  | 207                | 20                  | 114                | 10                  |
| C    | 66 ( 92)      | NE-SW                            | 059                | 82                  | 325                | 01                  | 235                | 08                  |
|      | 53 ( 68)      | WNW-ESE                          | 186                | 56                  | 015                | 33                  | 282                | 04                  |
| D    | 71 ( 98)      | NE-SW                            | 295                | 71                  | 144                | 17                  | 051                | 09                  |
|      | 38 ( 47)      | WNW-ESE                          | 184                | 42                  | 022                | 47                  | 283                | 09                  |

  

| Site | $\frac{\sigma_2 - \sigma_3}{\sigma_1 - \sigma_3} = \Phi$ | Average angle, $\Delta$ ( $^\circ$ ) | Unclassified data | Ambiguous data |
|------|----------------------------------------------------------|--------------------------------------|-------------------|----------------|
| A    | 1.0                                                      | 16                                   | 12 (17)           | 5              |
|      | 0.8                                                      | 12                                   |                   |                |
| B    | 0.9                                                      | 21                                   | 22 (32)           | 10             |
|      | 1.0                                                      | 13                                   |                   |                |
| C    | 0.8                                                      | 17                                   | 21 (28)           | 12             |
|      | 0.7                                                      | 14                                   |                   |                |
| D    | 0.3                                                      | 14                                   | 21 (22)           | 10             |
|      | 0.7                                                      | 12                                   |                   |                |

**Note:** Unclassified data refer to faults with angles between slickenside lineations and theoretical shear stress greater than  $45^\circ$  for both solutions. Ambiguous data refer to faults that have similar angles between slickenside lineations and shear stress for both solutions (within a range of  $10^\circ$ ).  $\Phi$  is the stress ratio. Weighted values are in parentheses. Average angle is that between actual striae and theoretical shear stress on fault plane.

TABLE 3. RESULTS OF AUTOMATIC SEPARATIONS OF TWO TYPES OF PALEOSTRESS WITH DIFFERENT DIRECTIONS OF EXTENSION, FOR PREDOMINANTLY STRIKE-SLIP AND PREDOMINANTLY DIP-SLIP FAULT DATA SETS OF SITES A + B AND C + D

| STRIKE-SLIP FAULT |               |                                  |                    |                     |                    |                     |                    |                     |
|-------------------|---------------|----------------------------------|--------------------|---------------------|--------------------|---------------------|--------------------|---------------------|
| Site              | Size of class | Type of extension ( $\sigma_3$ ) | $\sigma_1$ -axis   |                     | $\sigma_2$ -axis   |                     | $\sigma_3$ -axis   |                     |
|                   |               |                                  | trend ( $^\circ$ ) | plunge ( $^\circ$ ) | trend ( $^\circ$ ) | plunge ( $^\circ$ ) | trend ( $^\circ$ ) | plunge ( $^\circ$ ) |
| A + B             | 81 (113)      | NE-SW                            | 337                | 00                  | 246                | 67                  | 067                | 23                  |
|                   | 53 ( 79)      | E-W                              | 014                | 07                  | 257                | 75                  | 106                | 13                  |
| C + D             | 51 ( 57)      | NE-SW                            | 322                | 05                  | 082                | 81                  | 232                | 08                  |
|                   | 63 ( 87)      | E-W                              | 176                | 12                  | 031                | 76                  | 268                | 08                  |

  

| Site  | $\frac{\sigma_2 - \sigma_3}{\sigma_1 - \sigma_3} = \phi$ | Average angle, $\Delta$ ( $^\circ$ ) | Unclassified data | Ambiguous data |
|-------|----------------------------------------------------------|--------------------------------------|-------------------|----------------|
| A + B | 0.1<br>0.3                                               | 9<br>10                              | 1 (1)             | 34             |
| C + D | 0.4<br>0.4                                               | 14<br>11                             | 8 (8)             | 18             |

[Table 3.--continued on following page]

[TABLE 3.--Continued]

| DIP-SLIP (NORMAL) FAULT |               |                                  |                    |                     |                    |                     |                    |                     |
|-------------------------|---------------|----------------------------------|--------------------|---------------------|--------------------|---------------------|--------------------|---------------------|
| Site                    | Size of class | Type of extension ( $\sigma_3$ ) | $\sigma_1$ -axis   |                     | $\sigma_2$ -axis   |                     | $\sigma_3$ -axis   |                     |
|                         |               |                                  | trend ( $^\circ$ ) | plunge ( $^\circ$ ) | trend ( $^\circ$ ) | plunge ( $^\circ$ ) | trend ( $^\circ$ ) | plunge ( $^\circ$ ) |
| A + B                   | 40 ( 75)      | NE-SW                            | 213                | 78                  | 315                | 02                  | 045                | 12                  |
|                         | 32 ( 59)      | E-W                              | 301                | 82                  | 194                | 02                  | 103                | 07                  |
| C + D                   | 83 (124)      | NE-SW                            | 276                | 67                  | 150                | 14                  | 056                | 18                  |
|                         | 59 ( 72)      | E-W                              | 164                | 74                  | 016                | 13                  | 284                | 08                  |

  

| Site  | $\frac{\sigma_2 - \sigma_3}{\sigma_1 - \sigma_3} = \phi$ | Average angle, $\Delta$ ( $^\circ$ ) | Unclassified data | Ambiguous data |
|-------|----------------------------------------------------------|--------------------------------------|-------------------|----------------|
| A + B | 0.2<br>0.2                                               | 11<br>9                              | 7 (8)             | 22             |
| C + D | 0.1<br>0.1                                               | 11<br>15                             | 6 (7)             | 31             |

Note: Preliminary distinction between strike-slip and dip-slip (normal) fault movement has been made by comparing lateral and transverse components of motion (see Fig. 8 of Angelier and others, 1984). Unclassified data refer to faults with angles between slickenside lineations and theoretical shear stress greater than  $45^\circ$  for both solutions. Ambiguous data refer to faults that have similar angles between slickenside lineations and shear stress for both solutions (within a range of  $10^\circ$ ).  $\phi$  is the stress ratio. Weighted values are in parentheses. Average angle is that between actual striae and theoretical shear stress on fault plane.
